# Supplementary material for: Association of Elevated Blood Pressure Levels with Outcomes in Acute Ischemic Stroke Patients Treated with Intravenous Thrombolysis: A Systematic Review and Meta-Analysis
Source: PubMed Central journal article supplement — J Stroke. 2019 Jan 31;21(1):78–90. doi: 10.5853/jos.2018.02369 (PMC6372893; doi:10.5853/jos.2018.02369), 2019-01-31
Supplement: jos-2018-02369-suppl1.pdf [file jos-2018-02369-suppl1.pdf]

**Supplementary Table 1.** Definitions of symptomatic intracranial hemorrhage utilized by included studies

| Adjudicating study   | Definition                                                                                                                                                                                                                                                                                                              |
|----------------------|-------------------------------------------------------------------------------------------------------------------------------------------------------------------------------------------------------------------------------------------------------------------------------------------------------------------------|
| NINDS <sup>1</sup>   | Any ICH that had not been seen on a previous CT scan but there was subsequently either a suspicion of hemorrhage or any decline in neurologic status. To detect intracranial hemorrhage, CT scans were required at 24 hours and 7 to 10 days after the onset of stroke and when clinical findings suggested hemorrhage. |
| ECASS 2 <sup>2</sup> | Any ICH with neurological deterioration ( $\geq 4$ points increase on the NIHSS) from baseline or death within 22 to 36 hours. Establishment of a causal relationship between the hemorrhage and clinical deterioration or death was not a requirement.                                                                 |
| ECASS 3              | In addition to definition of ECASS 2, the hemorrhage must have been identified as the predominant cause of the neurologic deterioration.                                                                                                                                                                                |
| SITS-MOST            | Large or remote parenchymal ICH (type 2, defined as greater than 30% of the infarct area affected by hemorrhage with mass effect or extension outside the infarct) combined with neurological deterioration ( $\geq 4$ points increase on the NIHSS) from baseline or death within 22 to 36 hours.                      |

NINDS, National Institute of Neurological Disorders and Stroke; ICH, intracranial hemorrhage; CT, computed tomography; ECASS, European Cooperative Acute Stroke Study; NIHSS, National Institutes of Health Stroke Scale; SITS-MOST, Safe Implementation of Thrombolysis in Stroke-Monitoring Study.
