# Supplementary material for: Association of Elevated Blood Pressure Levels with Outcomes in Acute Ischemic Stroke Patients Treated with Intravenous Thrombolysis: A Systematic Review and Meta-Analysis
Source: PubMed Central journal article supplement — J Stroke. 2019 Jan 31;21(1):78–90. doi: 10.5853/jos.2018.02369 (PMC6372893; doi:10.5853/jos.2018.02369), 2019-01-31
Supplement: jos-2018-02369-suppl2.pdf [file jos-2018-02369-suppl2.pdf]

**Supplementary Table 2.** Excluded studies with reasons for exclusion

| Study                                | Reason for exclusion                      |
|--------------------------------------|-------------------------------------------|
| Gill et al. (2016) <sup>3</sup>      | No intended outcomes compared or reported |
| Liu et al. (2015) <sup>4</sup>       | Non-English article                       |
| Perini et al. (2010) <sup>5</sup>    | No intended outcomes compared or reported |
| Gilligan et al. (2002) <sup>6</sup>  | Patients not treated with alteplase       |
| Nathanson et al. (2014) <sup>7</sup> | No intended outcomes compared or reported |
| Darger et al. (2015) <sup>8</sup>    | No intended outcomes compared or reported |
| Bentsen et al. (2013) <sup>9</sup>   | No intended outcomes compared or reported |
