# Supplementary material for: Association of Elevated Blood Pressure Levels with Outcomes in Acute Ischemic Stroke Patients Treated with Intravenous Thrombolysis: A Systematic Review and Meta-Analysis
Source: PubMed Central journal article supplement — J Stroke. 2019 Jan 31;21(1):78–90. doi: 10.5853/jos.2018.02369 (PMC6372893; doi:10.5853/jos.2018.02369), 2019-01-31
Supplement: jos-2018-02369-suppl3.pdf [file jos-2018-02369-suppl3.pdf]

**Supplementary Table 3.** Baseline characteristics of acute ischemic stroke patients across included studies

| Study                                       | Mean age (yr)                                        | Initial NIHSS                                                    | OTT (min)                                               | Baseline SBP, DBP                                       | Female sex (%)                         | HTN (%)                                | HLD (%)                          | DM (%)                                 | AF (%)                                 | Prior AIS/TIA (%)             |
|---------------------------------------------|------------------------------------------------------|------------------------------------------------------------------|---------------------------------------------------------|---------------------------------------------------------|----------------------------------------|----------------------------------------|----------------------------------|----------------------------------------|----------------------------------------|-------------------------------|
| Ahmed et al. (2009) <sup>10</sup>           | 70 (60–76)                                           | 13 (8–18)                                                        | 145 (115–170)                                           | 151 (138–168), 82 (74–90)                               | 41.5                                   | NA                                     | 34.7                             | 17.4                                   | 26                                     | 12.5                          |
| Delgado-Mederos et al. (2008) <sup>11</sup> | 69.1±13.6                                            | 15 (10–19)                                                       | 194.3±64.7                                              | 149±28, 82±16                                           | 42.5                                   | 53.8                                   | 33.8                             | 21.3                                   | NA                                     | NA                            |
| Endo et al. (2013) <sup>12</sup>            | 70.8±11.6                                            | 12 (7–18)                                                        | 141 (121–165)                                           | NA                                                      | 34.5                                   | 60.5                                   | 21.3                             | 18                                     | 40.8                                   | NA                            |
| Huang et al. (2013) <sup>13</sup>           | 62.82±14.25 (mRS 0–1); 68.81±9.85 (mRS 2–6)          | 12.02±5.26 (mRS 0–1); 15.78±4.98 (mRS 2–6)                       | 142.8±72.6 (mRS 0–1); 154.2±61.8 (mRS 2–6)              | 135.45±19.36 (mRS 0–1); 148.78±19.39 (mRS 2–6)          | 54.5 (mRS 0–1); 47.8 (mRS 2–6)         | 65.45 (mRS 0–1); 71.74 (mRS 2–6)       | 30.91 (mRS 0–1); 23.91 (mRS 2–6) | 9.09 (mRS 0–1); 28.26 (mRS 2–6)        | 27.27 (mRS 0–1); 39.13 (mRS 2–6)       | 7.27 (mRS 0–1); 8.7 (mRS 2–6) |
| Idicula et al. (2008) <sup>14</sup>         | 63.7±14                                              | 13 (median)                                                      | NA                                                      | 156±23, 85±17                                           | 34.6                                   | 51.2                                   | 30.4                             | 6.3                                    | 25.4                                   | 23.2                          |
| Kellert et al. (2012) <sup>15</sup>         | 74.9±14.6 (sICH); 72.7±12.8 (no sICH)                | 15.5±12 (sICH); 10.5±9 (no sICH)                                 | NA                                                      | NA                                                      | 80 (sICH); 51.8 (no sICH)              | 100 (sICH); 80.6 (no sICH)             | 30 (sICH); 24.5 (no sICH)        | 30 (sICH); 24.2 (no sICH)              | 50 (sICH); 32.7 (no sICH)              | NA                            |
| Kellert et al. (2017) <sup>16</sup>         | 71 (63–77)                                           | 11 (7–16)                                                        | 145 (120–170)                                           | 155 (140–168), NA                                       | 40.3                                   | 69.7                                   | 34.7                             | 11                                     | 24.2                                   | 13.1                          |
| Lindsberg et al. (2003) <sup>17</sup>       | 63.6                                                 | 30.3±10.0 (SSS)                                                  | NA                                                      | NA                                                      | 46.6                                   | 64                                     | NA                               | 13                                     | 23                                     | 21                            |
| Liu et al. (2016) <sup>18</sup>             | 67.4±13.03                                           | 10 (5–16)                                                        | 232.9±93.85                                             | 153.5±22.56, 85.6±14.66                                 | 35.8                                   | 67.9                                   | 40.1                             | 20.8                                   | 39.9                                   | 17.6                          |
| Martins et al. (2016) <sup>19</sup>         | 73.28±11.50                                          | 15.29±7.01                                                       | 150.25±55.27                                            | NA                                                      | 46.1                                   | 80.4                                   | 52.7                             | 24.6                                   | 48.9                                   | NA                            |
| Menon et al. (2012) <sup>20</sup>           | 69.9±14.7                                            | 11 (7–18)                                                        | 135 (110–160)                                           | NA                                                      | 49.16                                  | 72.2                                   | 38.5                             | 24.2                                   | 20.6                                   | 23.8                          |
| Molina et al. (2004) <sup>21</sup>          | 67.9±13.6                                            | 16 (13–20)                                                       | 134.1±46.7                                              | NA                                                      | 52.5                                   | 49.6                                   | NA                               | 23.5                                   | 26.5                                   | NA                            |
| Molina et al. (2009) <sup>22</sup>          | 63±15 (Cohort 1); 68±15 (Cohort 2); 65±14 (Cohort 3) | 10 (4–14) (Cohort 1); 16 (9–21) (Cohort 2); 12 (7–14) (Cohort 3) | 139±33 (Cohort 1); 130±32 (Cohort 2); 126±46 (Cohort 3) | 150±22 (Cohort 1); 153±32 (Cohort 2); 157±19 (Cohort 3) | 34.6                                   | NA                                     | NA                               | NA                                     | NA                                     | NA                            |
| Rusanen et al. (2015) <sup>23</sup>         | 68.7±13.4                                            | 14 (10)                                                          | 130±38                                                  | NA                                                      | 42                                     | 65                                     | NA                               | 16                                     | 38                                     | NA                            |
| Saqqur et al. (2008) <sup>24</sup>          | 69±13                                                | 16 (12–20)                                                       | 134±32                                                  | 157±22, NA                                              | 47                                     | NA                                     | NA                               | NA                                     | NA                                     | NA                            |
| Tomii et al. (2011) <sup>25</sup>           | 72.7±9                                               | 13 (7–18)                                                        | NA                                                      | 158.4±33, 88.1±19.4                                     | 26                                     | 71                                     | 40                               | 20                                     | 49                                     | 20                            |
| Toni et al. (2012) <sup>26*</sup>           | 45 (18–50)                                           | 11.3±5.8                                                         | 145 (117–172)                                           | 140 (125–153), 81(73–90)                                | 41.7                                   | 27.1                                   | 20.6                             | 5.8                                    | 4.6                                    | 7.1                           |
| Tsigoulis et al. (2007) <sup>27</sup>       | 69±14 (recanalized); 68±13 (non-recanalized)         | 17 (6) (recanalized); 15 (6) (non-recanalized)                   | 142 (43) (recanalized); 145 (48) (non-recanalized)      | 160±22 (recanalized); 152±23 (non-recanalized)          | 47 (recanalized); 46 (non-recanalized) | 67 (recanalized); 60 (non-recanalized) | NA                               | 37 (recanalized); 20 (non-recanalized) | 35 (recanalized); 27 (non-recanalized) | NA                            |

Supplementary Table 3. Continued

| Study                                 | Mean age (yr)                                | Initial NIHSS                                          | OTT (min)                                                  | Baseline SBP, DBP                              | Female sex (%)                   | HTN (%)                                    | HLD (%)                          | DM (%)                                     | AF (%)                                     | Prior AIS/TIA (%)                |
|---------------------------------------|----------------------------------------------|--------------------------------------------------------|------------------------------------------------------------|------------------------------------------------|----------------------------------|--------------------------------------------|----------------------------------|--------------------------------------------|--------------------------------------------|----------------------------------|
| Tsigoulis et al. (2009) <sup>28</sup> | 71±11 (sICH); 66±15 (no sICH)                | 12 (10) (sICH); 8 (7) (no sICH)                        | 140 (80) (sICH); 125 (65) (no sICH)                        | 169±29 (sICH); 156±24 (no sICH)                | 45 (sICH); 44 (no sICH)          | 68 (sICH); 55 (no sICH)                    | NA                               | 19 (sICH); 13 (no sICH)                    | 23 (sICH); 11 (no sICH)                    | NA                               |
| Wahlgren et al. (2008) <sup>29†</sup> | 73 (sICH); 68 (no sICH)                      | 13 (sICH); 12 (no sICH)                                | 140 (no sICH)                                              | 150 (no sICH)                                  | 42 (sICH); 40 (no sICH)          | 76 (sICH); 58 (no sICH)                    | 35 (no sICH)                     | 23 (sICH); 16 (no sICH)                    | 36 (sICH); 24 (no sICH)                    | 19 (sICH); 10 (no sICH)          |
| Waltimo et al. (2016) <sup>30</sup>   | 70 (63–78) (sICH); 69 (59–76) (no sICH)      | 15 (10–21) (sICH); 9 (5–15) (no sICH)                  | 135 (105–230) (sICH); 120 (89–166) (no sICH)               | 157 (135–171) (sICH); 140 (140–171) (no sICH)  | 43.5 (sICH); 43.5 (no sICH)      | 64.2 (sICH); 58.0 (no sICH)                | 39.4 (sICH); 38.9 (no sICH)      | 19.3 (sICH); 13.9 (no sICH)                | 30.3 (sICH); 26.6 (no sICH)                | 11.0 (sICH); 13.2 (no sICH)      |
| Wu et al. (2017) <sup>31</sup>        | 60.04±11.08 (mRS 0–2); 62.71±12.31 (mRS 3–6) | 4 (2–7) (mRS 0–2); 10 (4–13) (mRS 3–6)                 | 200 (136–257.5) (mRS 0–2); 207 (157.5–267.25) (mRS 3–6)    | 147.31±21.72 (mRS 0–2); 149.85±22.61 (mRS 3–6) | 24.11 (mRS 0–2); 31.54 (mRS 3–6) | 64.82 (mRS 0–2); 73.08 (mRS 3–6)           | 40.71 (mRS 0–2); 31.54 (mRS 3–6) | 32.81 (mRS 0–2); 36.92 (mRS 3–6)           | 12.65 (mRS 0–2); 14.62 (mRS 3–6)           | 22.92 (mRS 0–2); 24.62 (mRS 3–6) |
| Wu et al. (2016) <sup>32</sup>        | 63.48±11.34                                  | 11 (7–16)                                              | 169.2±48                                                   | 148.03±20.95, NA                               | 39.01                            | 59.13                                      | 6.47                             | 17.38                                      | 17.91                                      | 18.44                            |
| Yan et al. (2015) <sup>33</sup>       | 68.81±11.49                                  | 12.51±6.62 (recanalized); 12.96±5.39 (non-recanalized) | 238.14±96.88 (recanalized); 225.30±92.39 (non-recanalized) | 147.98±20.21, 83.01±15.07                      | 32.3                             | 66.7 (recanalized); 67.6 (non-recanalized) | NA                               | 14.9 (recanalized); 18.9 (non-recanalized) | 56.3 (recanalized); 47.3 (non-recanalized) | NA                               |
| Yong et al. (2005) <sup>34†</sup>     | NA                                           | NA                                                     | NA                                                         | NA                                             | NA                               | NA                                         | NA                               | NA                                         | NA                                         | NA                               |
| Yong et al. (2008) <sup>35§</sup>     | NA                                           | NA                                                     | NA                                                         | NA                                             | NA                               | NA                                         | NA                               | NA                                         | NA                                         | NA                               |

Values are presented as median (interquartile range), mean±standard deviation, or number (%).

NIHSS, National Institutes of Health Stroke Scale; OTT, onset-to-treatment; SBP, systolic blood pressure; DBP, diastolic blood pressure; HTN, hypertension; HLD, hyperlipidemia; DM, diabetes mellitus; AF, atrial fibrillation; AIS, acute ischemic stroke; TIA, transient ischemic attack; NA, not available; mRS, modified Rankin Scale; sICH, symptomatic intracranial hemorrhage; SSS, Scandinavian Stroke Scale.

\*Results reported for patients 18 to 50 years old; †Demographic variables for sICH/Safe Implementation of Thrombolysis in Stroke-Monitoring Study (SITS-MOST) is presented; ‡50.4% of cohort was treated with intravenous thrombolysis (IVT). Specific demographic details for IVT cohort were not available; §51.3% of cohort was treated with IVT. Specific demographic details for IVT cohort were not available.
