# Supplementary material for: Association of Elevated Blood Pressure Levels with Outcomes in Acute Ischemic Stroke Patients Treated with Intravenous Thrombolysis: A Systematic Review and Meta-Analysis
Source: PubMed Central journal article supplement — J Stroke. 2019 Jan 31;21(1):78–90. doi: 10.5853/jos.2018.02369 (PMC6372893; doi:10.5853/jos.2018.02369), 2019-01-31
Supplement: jos-2018-02369-suppl4.pdf [file jos-2018-02369-suppl4.pdf]

**Supplementary Table 4.** Studies with adjusted analyses based on 1 mm Hg or 10 mm Hg BP increments

| BP increments                    | Study                                 | Pre-IVT                            |                      |                     |                     |                  | Post-IVT           |                  |                     |                  |  |
|----------------------------------|---------------------------------------|------------------------------------|----------------------|---------------------|---------------------|------------------|--------------------|------------------|---------------------|------------------|--|
|                                  |                                       | FFO                                | FI                   | sICH                | Mortality           | Recanalization   | FFO                | FI               | sICH                | Mortality        |  |
| Per 10 mm Hg                     | Endo et al. (2013) <sup>12</sup>      | SBP 0.96 (0.86–1.06)               | -                    | 1.08 (0.86–1.35)    | 1.03 (0.83–1.27)    | -                | 0.89 (0.80–0.99)   | -                | 1.24 (0.99–1.57)    | 1.05 (0.86–1.30) |  |
|                                  |                                       | DBP 1.0 (0.88–1.14)                | -                    | 0.99 (0.73–1.33)    | 0.87 (0.66–1.14)    | -                | 0.97 (0.84–1.11)   | -                | 1.27 (0.92–1.74)    | 1.09 (0.81–1.46) |  |
|                                  | Idicula et al. (2008) <sup>14</sup>   | SBP -                              | 0.79 (0.66–0.97)     | -                   | -                   | -                | -                  | 0.82 (0.69–1.00) | -                   | -                |  |
|                                  |                                       | DBP -                              | 0.97 (0.74–1.03)     | -                   | -                   | -                | -                  | 0.86 (0.68–1.01) | -                   | -                |  |
|                                  | Liu et al. (2016) <sup>18</sup>       | SBP 0.920 (0.831–1.018)            | -                    | 1.056 (0.819–1.363) | -                   | -                | 0.78 (0.691–0.879) | -                | 1.229 (0.970–1.558) | -                |  |
|                                  | Martins et al. (2016) <sup>19</sup>   | SBP -                              | -                    | -                   | -                   | -                | -                  | -                | 1.03 (1.01–1.05)    | -                |  |
|                                  | Menon et al. (2012) <sup>20</sup>     | SBP -                              | -                    | 1.12 (1.07–1.17)    | -                   | -                | -                  | -                | -                   | -                |  |
|                                  | Tomii et al. (2011) <sup>25</sup>     | SBP -                              | 0.96 (0.84–1.08)     | -                   | -                   | -                | -                  | 0.67 (0.48–0.91) | -                   | -                |  |
|                                  | Tsigoulis et al. (2009) <sup>28</sup> | SBP -                              | -                    | 1.22 (1.06–1.41)    | -                   | -                | -                  | -                | -                   | -                |  |
|                                  | Waitimo et al. (2016) <sup>30</sup>   | SBP -                              | -                    | -                   | -                   | -                | -                  | -                | 1.17 (1.03–1.33)    | -                |  |
| Yong et al. (2008) <sup>35</sup> | SBP 0.84 (0.74–0.94)                  | -                                  | -                    | 0.99 (0.84–1.18)    | -                   | 0.82 (0.73–0.91) | -                  | -                | 1.15 (0.99–1.34)    |                  |  |
| Per 1 mm Hg                      | Molina et al. (2009) <sup>22</sup>    | SBP 0.96 (0.92–1.02)               | 1.00 (0.95–1.06)     | -                   | 1.07 (0.95–1.21)    | 0.98 (0.94–1.02) | -                  | -                | -                   | -                |  |
|                                  |                                       | DBP 1.01 (0.95–1.07)               | 1.05 (0.97–1.13)     | -                   | 0.97 (0.86–1.09)    | 0.99 (0.94–1.04) | -                  | -                | -                   | -                |  |
|                                  | Rusanen et al. (2015) <sup>23</sup>   | SBP -                              | 0.96 (0.93–1.00)     | -                   | -                   | -                | -                  | -                | -                   | -                |  |
|                                  | Tsigoulis et al. (2007) <sup>27</sup> | SBP 0.992 (0.980–1.004)            | 0.991 (0.979–1.004)  | 0.997 (0.978–1.016) | 1.002 (0.987–1.016) | 0.85 (0.74–0.98) | -                  | -                | -                   | -                |  |
|                                  | Huang et al. (2013) <sup>13</sup>     | SBP -                              | 0.96 (0.93–1.00)     | -                   | -                   | -                | -                  | -                | -                   | -                |  |
|                                  | Wu et al. (2016) <sup>32</sup>        | SBP 0.98 (0.96–1.00)               | -                    | -                   | -                   | -                | -                  | -                | -                   | -                |  |
|                                  | Wu et al. (2017) <sup>31</sup>        | SBP -                              | -                    | -                   | -                   | -                | 0.98 (0.97–0.99)   | -                | -                   | -                |  |
|                                  | Lindsberg et al. (2003) <sup>17</sup> | DBP -                              | 1.07 (1.01–1.14)     | -                   | -                   | -                | -                  | -                | -                   | -                |  |
|                                  | Wahlgren et al. (2008) <sup>29</sup>  | SBP -                              | -                    | 1.33 (1.06–1.65)    | -                   | -                | -                  | -                | -                   | -                |  |
|                                  | Per 25 mm Hg                          | Keller et al. (2017) <sup>16</sup> | SBP 0.84 (0.80–0.88) | 0.89 (0.84–0.94)    | 1.24 (1.03–1.49)    | 1.06 (0.98–1.15) | -                  | -                | -                   | -                |  |

Values are presented as adjusted odds ratio (95% confidence interval).

BP, blood pressure; IVT, intravenous treatment; FFO, favorable functional outcome (modified Rankin Scale [mRS] 0–1); FI, functional independence (mRS 0–2); sICH, symptomatic intracranial hemorrhage; SBP, systolic blood pressure; DBP, diastolic blood pressure.
