# Supplementary material for: Association of Elevated Blood Pressure Levels with Outcomes in Acute Ischemic Stroke Patients Treated with Intravenous Thrombolysis: A Systematic Review and Meta-Analysis
Source: PubMed Central journal article supplement — J Stroke. 2019 Jan 31;21(1):78–90. doi: 10.5853/jos.2018.02369 (PMC6372893; doi:10.5853/jos.2018.02369), 2019-01-31
Supplement: jos-2018-02369-suppl5.pdf [file jos-2018-02369-suppl5.pdf]

**Supplementary Table 5.** Quality assessment of included studies with the Newcastle-Ottawa Scale

| Study                                       | Selection | Comparability | Outcome | Overall score |
|---------------------------------------------|-----------|---------------|---------|---------------|
| Ahmed et al. (2009) <sup>10</sup>           | 4*        | 2*            | 2*      | 8/9           |
| Delgado-Mederos et al. (2008) <sup>11</sup> | 4*        | 2*            | 2*      | 8/9           |
| Endo et al. (2013) <sup>12</sup>            | 4*        | 2*            | 2*      | 8/9           |
| Huang et al. (2013) <sup>13</sup>           | 4*        | 2*            | 2*      | 8/9           |
| Idicula et al. (2008) <sup>14</sup>         | 4*        | 2*            | 2*      | 8/9           |
| Kellert et al. (2012) <sup>15</sup>         | 4*        | 2*            | 2*      | 8/9           |
| Kellert et al. (2017) <sup>16</sup>         | 4*        | 2*            | 2*      | 8/9           |
| Lindsberg et al. (2003) <sup>17</sup>       | 4*        | 2*            | 3*      | 9/9           |
| Liu et al. (2016) <sup>18</sup>             | 4*        | 2*            | 2*      | 8/9           |
| Martins et al. (2016) <sup>19</sup>         | 4*        | 2*            | 2*      | 8/9           |
| Menon et al. (2012) <sup>20</sup>           | 4*        | 2*            | 2*      | 8/9           |
| Molina et al. (2004) <sup>21</sup>          | 4*        | 2*            | 3*      | 9/9           |
| Molina et al. (2009) <sup>22</sup>          | 4*        | 2*            | 3*      | 9/9           |
| Rusanen et al. (2015) <sup>23</sup>         | 4*        | 2*            | 2*      | 8/9           |
| Saqqur et al. (2008) <sup>24</sup>          | 4*        | 2*            | 3*      | 9/9           |
| Tomii et al. (2011) <sup>25</sup>           | 4*        | 2*            | 2*      | 8/9           |
| Toni et al. (2012) <sup>26</sup>            | 4*        | 2*            | 2*      | 8/9           |
| Tsivgoulis et al. (2007) <sup>27</sup>      | 4*        | 2*            | 3*      | 9/9           |
| Tsivgoulis et al. (2009) <sup>28</sup>      | 4*        | 2*            | 2*      | 8/9           |
| Wahlgren et al. (2008) <sup>29</sup>        | 4*        | 2*            | 2*      | 8/9           |
| Waltimo et al. (2016) <sup>30</sup>         | 4*        | 2*            | 3*      | 9/9           |
| Wu et al. (2017) <sup>31</sup>              | 4*        | 2*            | 2*      | 8/9           |
| Wu et al. (2016) <sup>32</sup>              | 4*        | 2*            | 2*      | 8/9           |
| Yan et al. (2015) <sup>33</sup>             | 4*        | 2*            | 2*      | 8/9           |
| Yong et al. (2005) <sup>34</sup>            | 4*        | 2*            | 2*      | 8/9           |
| Yong et al. (2008) <sup>35</sup>            | 4*        | 2*            | 2*      | 8/9           |
| Overall score                               | 104/104   | 52/52         | 58/78   | 214/234       |
