# Supplementary material for: Association of Elevated Blood Pressure Levels with Outcomes in Acute Ischemic Stroke Patients Treated with Intravenous Thrombolysis: A Systematic Review and Meta-Analysis
Source: PubMed Central journal article supplement — J Stroke. 2019 Jan 31;21(1):78–90. doi: 10.5853/jos.2018.02369 (PMC6372893; doi:10.5853/jos.2018.02369), 2019-01-31
Supplement: jos-2018-02369-suppl6.pdf [file jos-2018-02369-suppl6.pdf]

**Supplementary Table 6.** Sensitivity analyses on the primary and secondary analyses of pre-treatment BP impact on various outcomes

| Clinical outcome | BP level | Unadjusted analyses |                        |                                        | Adjusted analyses* |                     |                                        |
|------------------|----------|---------------------|------------------------|----------------------------------------|--------------------|---------------------|----------------------------------------|
|                  |          | Studies             | SMD (95% CI)           | Heterogeneity                          | Studies            | OR (95% CI)         | Heterogeneity                          |
| FFO              | SBP      | 5                   | -0.23 (-0.56 to 0.09)  | $I^2=88%$ , $P$ for Cochran $Q < 0.01$ | 8                  | 0.89 (0.81 to 0.96) | $I^2=76%$ , $P$ for Cochran $Q=0.19$   |
|                  | DBP      | 4                   | -0.02 (-0.23 to 0.18)  | $I^2=61%$ , $P$ for Cochran $Q=0.30$   | 2                  | 1.00 (0.89 to 1.14) | $I^2=75%$ , $P$ for Cochran $Q=0.46$   |
| FI               | SBP      | 7                   | -0.18 (-0.38 to 0.02)  | $I^2=76%$ , $P$ for Cochran $Q=0.01$   | 6                  | 0.89 (0.79 to 0.99) | $I^2=75%$ , $P$ for Cochran $Q=0.09$   |
|                  | DBP      | 6                   | 0.13 (-0.18 to 0.43)   | $I^2=74%$ , $P$ for Cochran $Q=0.08$   | 3                  | 1.33 (0.85 to 2.09) | $I^2=55%$ , $P$ for Cochran $Q=0.06$   |
| sICH             | SBP      | 6                   | 0.23 (0.01 to 0.46)    | $I^2=51%$ , $P$ for Cochran $Q=0.16$   | 8                  | 1.08 (1.02 to 1.14) | $I^2=71%$ , $P$ for Cochran $Q < 0.01$ |
|                  | DBP      | 4                   | 0.11 (-0.04 to 0.26)   | $I^2=5%$ , $P$ for Cochran $Q=0.83$    | 1                  | 0.99 (0.73 to 1.34) | 0.95                                   |
| Mortality        | SBP      | 3                   | 0.26 (-0.23 to 0.76)   | $I^2=87%$ , $P$ for Cochran $Q=0.08$   | 5                  | 1.03 (0.88 to 1.18) | $I^2=76%$ , $P$ for Cochran $Q=0.86$   |
|                  | DBP      | 2                   | -0.00 (-0.06 to 0.06)  | $I^2=0%$ , $P$ for Cochran $Q=0.83$    | 2                  | 0.86 (0.66 to 1.13) | $I^2=0%$ , $P$ for Cochran $Q=0.79$    |
| Recanalization   | SBP      | 3                   | -0.21 (-0.41 to -0.01) | $I^2=0%$ , $P$ for Cochran $Q=0.94$    | 2                  | 0.47 (0.13 to 1.75) | $I^2=71%$ , $P$ for Cochran $Q=0.05$   |
|                  | DBP      | 2                   | -0.30 (-0.67 to 0.06)  | $I^2=12%$ , $P$ for Cochran $Q=0.82$   | 1                  | 0.90 (0.54 to 1.52) | 0.70                                   |

BP, blood pressure; SMD, standardized mean difference; CI, confidence interval; OR, odds ratio; FFO, favorable functional outcome (modified Rankin Scale [mRS] 0–1); SBP, systolic blood pressure; DBP, diastolic blood pressure; FI, functional independence (mRS 0–2); sICH, symptomatic intracranial hemorrhage.

\*In the adjusted for potential confounders analyses all associations of SBP/DBP with the outcomes of interest are presented per 10 mm Hg SBP/DBP increment.
