# Supplementary material for: Association of Elevated Blood Pressure Levels with Outcomes in Acute Ischemic Stroke Patients Treated with Intravenous Thrombolysis: A Systematic Review and Meta-Analysis
Source: PubMed Central journal article supplement — J Stroke. 2019 Jan 31;21(1):78–90. doi: 10.5853/jos.2018.02369 (PMC6372893; doi:10.5853/jos.2018.02369), 2019-01-31
Supplement: jos-2018-02369-suppl7.pdf [file jos-2018-02369-suppl7.pdf]

**Supplementary Table 7.** Sensitivity analyses on the primary and secondary analyses of post-treatment BP impact on various outcomes

| Clinical outcome | BP level | Unadjusted analyses |                        |       | Adjusted analyses*                        |         |                      |       |                                            |
|------------------|----------|---------------------|------------------------|-------|-------------------------------------------|---------|----------------------|-------|--------------------------------------------|
|                  |          | Studies             | SMD (95% CI)           | P     | Heterogeneity                             | Studies | OR (95% CI)          | P     | Heterogeneity                              |
| FFO              | SBP      | 2                   | -0.21 (-0.31 to -0.10) | <0.01 | I <sup>2</sup> =28%, P for Cochran Q=0.29 | 4       | 0.83 (0.78 to 0.89)  | <0.01 | I <sup>2</sup> =28%, P for Cochran Q=0.43  |
|                  | DBP      | 2                   | -0.02 (-0.12 to 0.08)  | 0.70  | I <sup>2</sup> =28%, P for Cochran Q=0.30 | 1       | 0.97 (0.84 to 1.12)  | 0.68  | -                                          |
| FI               | SBP      | 4                   | -0.21 (-0.31 to -0.11) | <0.01 | I <sup>2</sup> =16%, P for Cochran Q=0.64 | 4       | 0.70 (0.56 to 0.87)  | <0.01 | I <sup>2</sup> =82%, P for Cochran Q <0.01 |
|                  | DBP      | 3                   | 0.00 (-0.17 to 0.17)   | 0.99  | I <sup>2</sup> =12%, P for Cochran Q=0.70 | 1       | 0.86 (0.68 to 1.09)  | 0.21  | -                                          |
| sICH             | SBP      | 3                   | 0.52 (-0.04 to 1.08)   | 0.07  | I <sup>2</sup> =63%, P for Cochran Q=0.22 | 4       | 1.11 (1.02 to 1.22)  | 0.02  | I <sup>2</sup> =52%, P for Cochran Q=0.04  |
|                  | DBP      | 3                   | 0.22 (-0.45 to 0.88)   | 0.52  | I <sup>2</sup> =73%, P for Cochran Q=0.10 | 2       | 1.08 (0.90 to 1.28)  | 0.39  | I <sup>2</sup> =41%, P for Cochran Q=0.21  |
| Mortality        | SBP      | -                   | -                      | -     | -                                         | 3       | 1.19 (0.95 to 1.51-) | 0.13  | I <sup>2</sup> =69%, P for Cochran Q=0.15  |
|                  | DBP      | -                   | -                      | -     | -                                         | 1       | 1.09 (0.81 to 1.47)  | 0.57  | -                                          |

BP, blood pressure; SMD, standardized mean difference; CI, confidence interval; OR, odds ratio; FFO, favorable functional outcome (modified Rankin Scale [mRS] 0–1); SBP, systolic blood pressure; DBP, diastolic blood pressure; FI, functional independence (mRS 0–2); sICH, symptomatic intracranial hemorrhage.

\*In the adjusted for potential confounders analyses all associations of SBP/DBP with the outcomes of interest are presented per 10 mm Hg SBP/DBP increment.
