# Supplementary material for: Association of Elevated Blood Pressure Levels with Outcomes in Acute Ischemic Stroke Patients Treated with Intravenous Thrombolysis: A Systematic Review and Meta-Analysis
Source: PubMed Central journal article supplement — J Stroke. 2019 Jan 31;21(1):78–90. doi: 10.5853/jos.2018.02369 (PMC6372893; doi:10.5853/jos.2018.02369), 2019-01-31
Supplement: jos-2018-02369-suppl8.pdf [file jos-2018-02369-suppl8.pdf]

**Supplementary Table 8.** Meta-regression analyses on the association of baseline characteristics with the likelihood of functional independence at 3 months

| Variable                                  | No. of studies | Coefficient (95% CI)      | <i>P</i> |
|-------------------------------------------|----------------|---------------------------|----------|
| Female sex                                | 7              | -0.003 (-0.024 to 0.018)  | 0.764    |
| Hypertension                              | 5              | 0.005 (-0.034 to 0.045)   | 0.794    |
| Dyslipidemia                              | 4              | -0.018 (-0.077 to 0.042)  | 0.559    |
| Diabetes mellitus                         | 6              | -0.013 (-0.024 to -0.003) | 0.014    |
| Atrial fibrillation                       | 4              | -0.012 (-0.037 to 0.012)  | 0.321    |
| Prior stroke or transient ischemic attack | 3              | -0.002 (-0.018 to 0.013)  | 0.759    |

CI, confidence interval.
