# Supplementary material for: Association of Elevated Blood Pressure Levels with Outcomes in Acute Ischemic Stroke Patients Treated with Intravenous Thrombolysis: A Systematic Review and Meta-Analysis
Source: PubMed Central journal article supplement — J Stroke. 2019 Jan 31;21(1):78–90. doi: 10.5853/jos.2018.02369 (PMC6372893; doi:10.5853/jos.2018.02369), 2019-01-31
Supplement: jos-2018-02369-suppl13.pdf [file jos-2018-02369-suppl13.pdf]

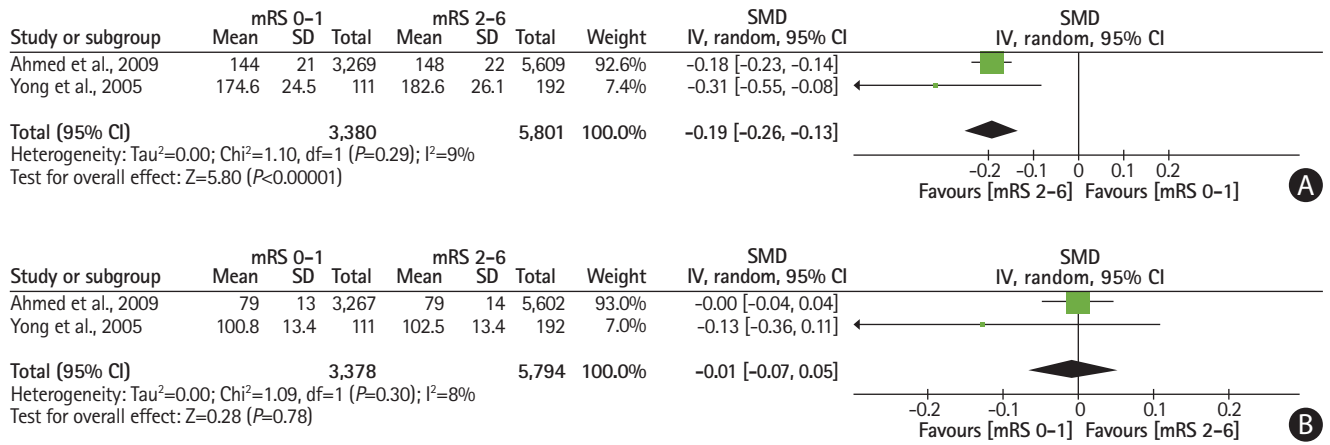

**Supplementary Figure 5.** Forest plots evaluating the associations of post-treatment (A) systolic blood pressure levels and (B) diastolic blood pressure levels with favorable functional outcome. mRS, modified Rankin Scale; SMD, standardized mean difference; SD, standard deviation; IV, intravenous; CI, confidence interval.
