# Supplementary material for: Association of Elevated Blood Pressure Levels with Outcomes in Acute Ischemic Stroke Patients Treated with Intravenous Thrombolysis: A Systematic Review and Meta-Analysis
Source: PubMed Central journal article supplement — J Stroke. 2019 Jan 31;21(1):78–90. doi: 10.5853/jos.2018.02369 (PMC6372893; doi:10.5853/jos.2018.02369), 2019-01-31
Supplement: jos-2018-02369-suppl39.pdf [file jos-2018-02369-suppl39.pdf]

## Supplementary References

1. National Institute of Neurological Disorders and Stroke rt-PA Stroke Study Group. Tissue plasminogen activator for acute ischemic stroke. *N Engl J Med* 1995;333:1581-1587.
2. Hacke W, Kaste M, Fieschi C, von Kummer R, Davalos A, Meier D, et al. Randomised double-blind placebo-controlled trial of thrombolytic therapy with intravenous alteplase in acute ischaemic stroke (ECASS II). Second European-Australasian Acute Stroke Study Investigators. *Lancet* 1998;352:1245-1251.
3. Gill D, Cox T, Aravind A, Wilding P, Korompoki E, Veltkamp R, et al. A fall in systolic blood pressure 24 hours after thrombolysis for acute ischemic stroke is associated with early neurological recovery. *J Stroke Cerebrovasc Dis* 2016;25:1539-1543.
4. Liu KQ, Chen QM, Yan SQ, Zhang S, Lou M. Relationship between early blood pressure variability and reperfusion in acute ischemic stroke patients with intravenous thrombolysis. *Zhejiang Da Xue Xue Bao Yi Xue Ban* 2015;44:603-610, 617.
5. Perini F, De Boni A, Marcon M, Bolgan I, Pellizzari M, Dionisio LD. Systolic blood pressure contributes to intracerebral haemorrhage after thrombolysis for ischemic stroke. *J Neural Sci* 2010;297:52-54.
6. Gilligan AK, Markus R, Read S, Srikanth V, Hirano T, Fitt G, et al. Baseline blood pressure but not early computed tomography changes predicts major hemorrhage after streptokinase in acute ischemic stroke. *Stroke* 2002;33:2236-2242.
7. Nathanson D, Patrone C, Nyström T, von Euler M. Sex, diastolic blood pressure, and outcome after thrombolysis for ischemic stroke. *Stroke Res Treat* 2014;2014:747458.
8. Darger B, Gonzales N, Banuelos RC, Peng H, Radecki RP, Doshi PB. Outcomes of patients requiring blood pressure control before thrombolysis with tpa for acute ischemic stroke. *West J Emerg Med* 2015;16:1002-1006.
9. Bentsen L, Ovesen C, Christensen AF, Christensen H. Does the admission blood pressure associate with short- and long term outcome in stroke patients treated with thrombolysis? A single centre study. *Int J Hypertens* 2013;2013:610353.
10. Ahmed N, Wahlgren N, Brainin M, Castillo J, Ford GA, Kaste M, et al. Relationship of blood pressure, antihypertensive therapy, and outcome in ischemic stroke treated with intravenous thrombolysis: retrospective analysis from Safe Implementation of Thrombolysis in Stroke-International Stroke Thrombolysis Register (SITS-ISTR). *Stroke* 2009;40:2442-2449.
11. Delgado-Mederos R, Ribo M, Rovira A, Rubiera M, Munuera J, Santamarina E, et al. Prognostic significance of blood pressure variability after thrombolysis in acute stroke. *Neurology* 2008;71:552-558.
12. Endo K, Kario K, Koga M, Nakagawara J, Shiokawa Y, Yamagami H, et al. Impact of early blood pressure variability on stroke outcomes after thrombolysis: the SAMURAI rt-PA Registry. *Stroke* 2013;44:816-818.
13. Huang YH, Zhuo ST, Chen YF, Li MM, Lin YY, Yang ML, et al. Factors influencing clinical outcomes of acute ischemic stroke treated with intravenous recombinant tissue plasminogen activator. *Chin Med J (Engl)* 2013;126:4685-4690.
14. Idracula TT, Waje-Andreassen U, Brogger J, Naess H, Lundstadsveen MT, Thomassen L. The effect of physiologic derangement in patients with stroke treated with thrombolysis. *J Stroke Cerebrovasc Dis* 2008;17:141-146.
15. Kellert L, Sykora M, Gumbinger C, Herrmann O, Ringleb PA. Blood pressure variability after intravenous thrombolysis in acute stroke does not predict intracerebral hemorrhage but poor outcome. *Cerebrovasc Dis* 2012;33:135-140.
16. Kellert L, Hametner C, Ahmed N, Rauch G, MacLeod MJ, Perini F, et al. Reciprocal interaction of 24-hour blood pressure variability and systolic blood pressure on outcome in stroke thrombolysis. *Stroke* 2017;48:1827-1834.
17. Lindsberg PJ, Soenne L, Roine RO, Salonen O, Tatlisumak T, Kallela M, et al. Community-based thrombolytic therapy of acute ischemic stroke in Helsinki. *Stroke* 2003;34:1443-1449.
18. Liu K, Yan S, Zhang S, Guo Y, Lou M. Systolic blood pressure variability is associated with severe hemorrhagic transformation in the early stage after thrombolysis. *Transl Stroke Res* 2016;7:186-191.
19. Martins AI, Sargento-Freitas J, Silva F, Jesus-Ribeiro J, Correia I, Gomes JP, et al. Recanalization modulates association between blood pressure and functional outcome in acute ischemic stroke. *Stroke* 2016;47:1571-1576.
20. Menon BK, Saver JL, Prabhakaran S, Reeves M, Liang L, Olson DM, et al. Risk score for intracranial hemorrhage in patients with acute ischemic stroke treated with intravenous tissue-type plasminogen activator. *Stroke* 2012;43:2293-2299.
21. Molina CA, Alexandrov AV, Demchuk AM, Saqqur M, Uchino K, Alvarez-Sabín J, et al. Improving the predictive accuracy of recanalization on stroke outcome in patients treated with tissue plasminogen activator. *Stroke* 2004;35:151-156.
22. Molina CA, Barreto AD, Tsivgoulis G, Sierzenski P, Malkoff MD, Rubiera M, et al. Transcranial ultrasound in clinical sonothrombolysis (TUCSON) trial. *Ann Neurol* 2009;66:28-38.
23. Rusanen H, Saarinen JT, Sillanpää N. The association of blood pressure and collateral circulation in hyperacute ischemic stroke patients treated with intravenous thrombolysis. *Cerebrovasc Dis* 2015;39:130-137.

24. Saqqur M, Tsivgoulis G, Molina CA, Demchuk AM, Siddiqui M, Alvarez-Sabín J, et al. Symptomatic intracerebral hemorrhage and recanalization after IV rt-PA: a multicenter study. *Neurology* 2008;71:1304–1312.
25. Tomii Y, Toyoda K, Nakashima T, Nezu T, Koga M, Yokota C, et al. Effects of hyperacute blood pressure and heart rate on stroke outcomes after intravenous tissue plasminogen activator. *J Hypertens* 2011;29:1980–1987.
26. Toni D, Ahmed N, Anzini A, Lorenzano S, Brozman M, Kaste M, et al. Intravenous thrombolysis in young stroke patients: results from the SITS-ISTR. *Neurology* 2012;78:880–887.
27. Tsivgoulis G, Saqqur M, Sharma VK, Lao AY, Hill MD, Alexandrov AV, et al. Association of pretreatment blood pressure with tissue plasminogen activator-induced arterial recanalization in acute ischemic stroke. *Stroke* 2007;38:961–966.
28. Tsivgoulis G, Frey JL, Flaster M, Sharma VK, Lao AY, Hoover SL, et al. Pre-tissue plasminogen activator blood pressure levels and risk of symptomatic intracerebral hemorrhage. *Stroke* 2009;40:3631–3634.
29. Wahlgren N, Ahmed N, Eriksson N, Aichner F, Bluhmki E, Dávalos A, et al. Multivariable analysis of outcome predictors and adjustment of main outcome results to baseline data profile in randomized controlled trials: Safe Implementation of Thrombolysis in Stroke–MOonitoring Study (SITS-MOST). *Stroke* 2008;39:3316–3322.
30. Waltimo T, Haapaniemi E, Surakka IL, Melkas S, Sairanen T, Si-bolt G, et al. Post-thrombolytic blood pressure and symptomatic intracerebral hemorrhage. *Eur J Neurol* 2016;23:1757–1762.
31. Wu L, Huang X, Wu D, Zhao W, Wu C, Che R, et al. Relationship between post-thrombolysis blood pressure and outcome in acute ischemic stroke patients undergoing thrombolysis therapy. *J Stroke Cerebrovasc Dis* 2017;26:2279–2286.
32. Wu W, Huo X, Zhao X, Liao X, Wang C, Pan Y, et al. Relationship between blood pressure and outcomes in acute ischemic stroke patients administered lytic medication in the TIMS-China study. *PLoS One* 2016;11:e0144260.
33. Yan S, Liu K, Cao J, Liebeskind DS, Lou M. “Sudden drop” in blood pressure is associated with recanalization after thrombolysis. *Medicine (Baltimore)* 2015;94:e1132.
34. Yong M, Diener HC, Kaste M, Mau J. Characteristics of blood pressure profiles as predictors of long-term outcome after acute ischemic stroke. *Stroke* 2005;36:2619–2625.
35. Yong M, Kaste M. Association of characteristics of blood pressure profiles and stroke outcomes in the ECASS-II trial. *Stroke* 2008;39:366–372.
